# Supplementary material for: New ruthenium polypyridyl complexes as potential sensors of acetonitrile and catalysts for water oxidation
Source: Royal Society of Chemistry journal article supplement (doi:10.1039/d1ra09455f), 2022-01-01
Supplement: d1ra09455f1.pdf [file d1ra09455f1.pdf]

## ***Supporting Information for:***

### **New Ruthenium Polypyridyl Complexes and their Applications in Acetonitrile Detection and in Catalysis for Water Oxidation**

Pedro O. Abate,<sup>[a]</sup> Analía M. Peyrot,<sup>[a]</sup> Xavier Fontrodona,<sup>[b]</sup> Isabel Romero,<sup>[b]</sup> Florencia Fagalde<sup>[a]\*</sup> and Néstor E. Katz<sup>[a]\*</sup>

---

[a] Dr. P. O. Abate, Lic. Analía M. Peyrot, Dr. F. Fagalde (corresponding author) and Dr. N. E. Katz (corresponding author)  
INQUINOA (CONICET-UNT)  
Ayacucho 471  
4000 San Miguel de Tucumán  
Argentina  
E-mail: [nestor.katz@fbqf.unt.edu.ar](mailto:nestor.katz@fbqf.unt.edu.ar) [florencia.fagalde@fbqf.unt.edu.ar](mailto:florencia.fagalde@fbqf.unt.edu.ar)

[b] Dr. X. Fontrodona and Dr. María I. Romero  
Serveis Tècnics de Recerca and Departament de Química  
Universitat de Girona  
C/ M. Aurèlia Campmany  
69 E-17003 Girona  
Spain

## Table of Contents

- Figure S1.** ESI-MS of complex **1**.
- Figure S2.** 400 MHz  $^1\text{H}$  NMR spectrum of **1** dissolved in  $\text{CD}_3\text{OD}$ .
- Figure S3.** 2D  $^1\text{H}$ - $^1\text{H}$  COSY spectrum of **1** dissolved in  $\text{CD}_3\text{OD}$ .
- Figure S4.** 2D  $^1\text{H}$ - $^1\text{H}$  NOESY spectrum of **1** dissolved in  $\text{CD}_3\text{OD}$ .
- Figure S5.**  $^1\text{H}$ - $^{15}\text{N}$  HMBC spectrum of **1** dissolved in  $\text{CD}_3\text{OD}$ .
- Figure S6.** 100 MHz  $^{13}\text{C}$  NMR spectrum of **1** dissolved in  $\text{CD}_3\text{OD}$ .
- Figure S7.** 2D  $^1\text{H}$ - $^{13}\text{C}$  HSQC spectrum of **1** dissolved in  $\text{CD}_3\text{OD}$ .
- Figure S8.** 2D  $^1\text{H}$ - $^{13}\text{C}$  HMBC spectrum of **1** dissolved in  $\text{CD}_3\text{OD}$ .
- Figure S9.** Crystal structure of **1**·**3H<sub>2</sub>O**. with counter-anion and solvent molecules.
- Table S1.** Sample and crystal data for **1**·**3H<sub>2</sub>O**.
- Table S2.** Data collection and structure refinement for **1**·**3H<sub>2</sub>O**.
- Table S3.** Bond lengths (Å) for **1**·**3H<sub>2</sub>O**.
- Figure S10.** View of the two-dimensional layer formed by the cationic part of **1**·**3H<sub>2</sub>O**
- Figure S11.** DPV vs **2** pH.
- Figure S12.** CV of **2** at different pH values.
- Figure S13.**  $[\text{O}_2]$  vs  $t$  for **2** in  $\text{HClO}_4$  0.1 M,  $C = 3.10^{-5}$  M after adding 30 equivalents of Ce(IV)
- Figure S14**  $^{\log} v_{\text{O}_2}$  vs.  $(^{\log} [\text{cat}]_0)$  for **2** in  $\text{HClO}_4$  0.1 M at  $T=20^\circ\text{C}$ .
- Table S4.** Energies and percent contributions of selected MO's for complexes **1-3**.
- Table S5.** Selected singlet excited state transitions with their group contributions for **1**.
- Table S6.** Selected singlet excited state transitions with their group contributions for **2**.
- Table S7.** Selected singlet excited state transitions with their group contributions for **3**.
- Figure S15.** EDDM for selected transitions of complexes **1-3**.

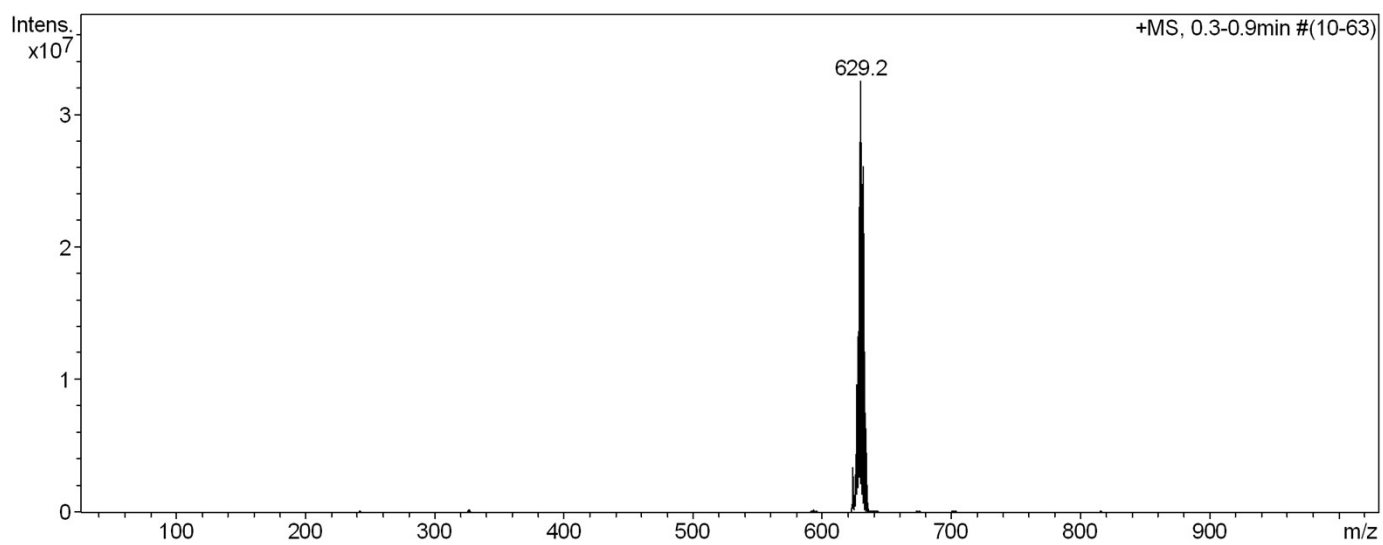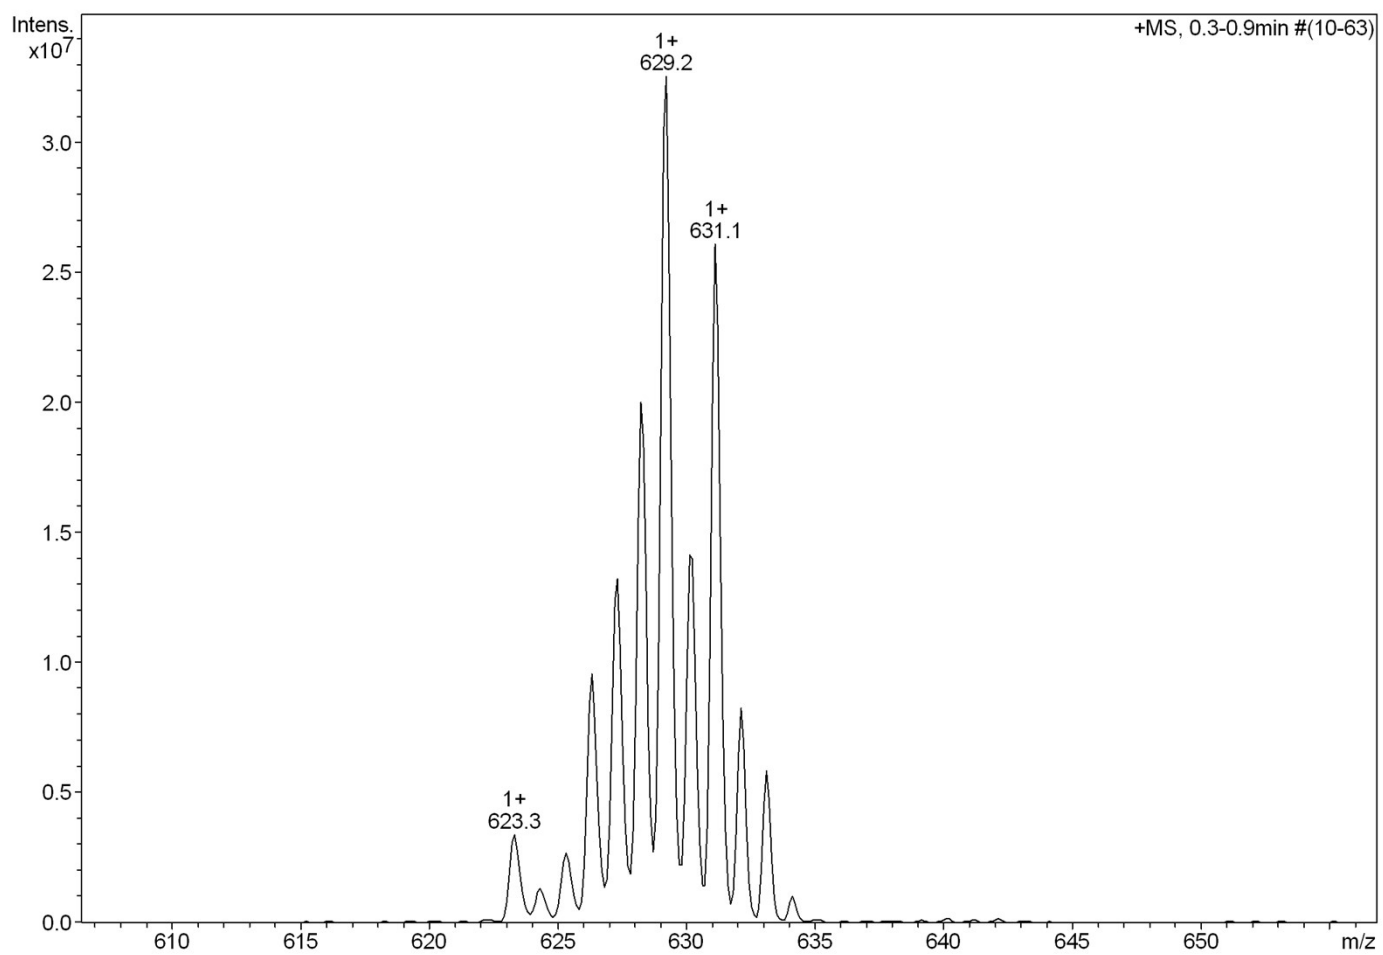

**Figure S1.** ESI-MS of complex 1.

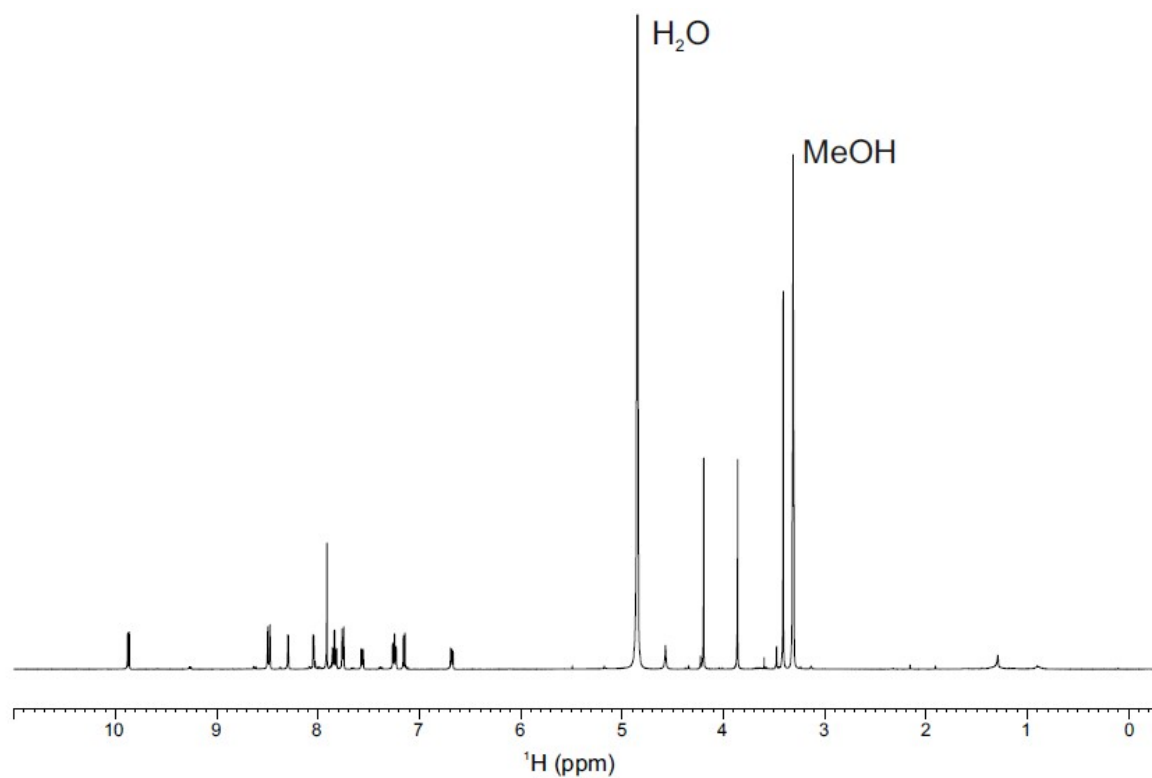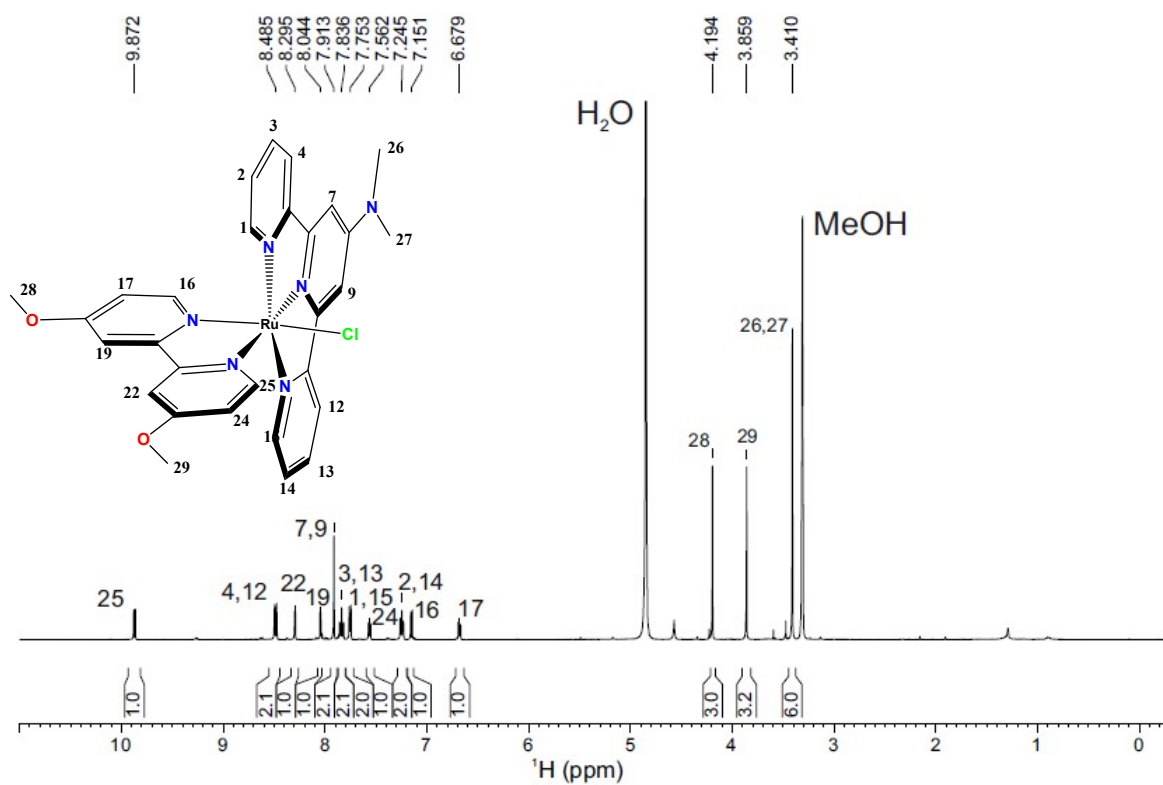

Figure S2. 400 MHz  $^1\text{H}$  NMR spectrum of **1** dissolved in  $\text{CD}_3\text{OD}$ .

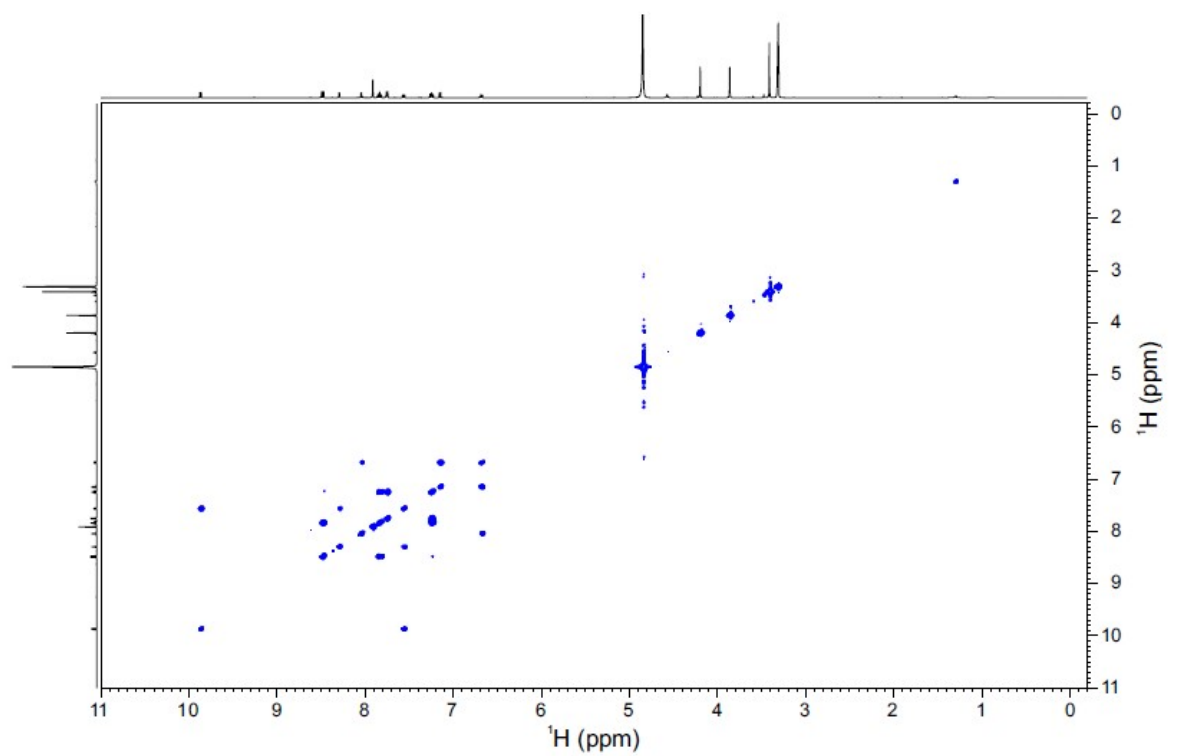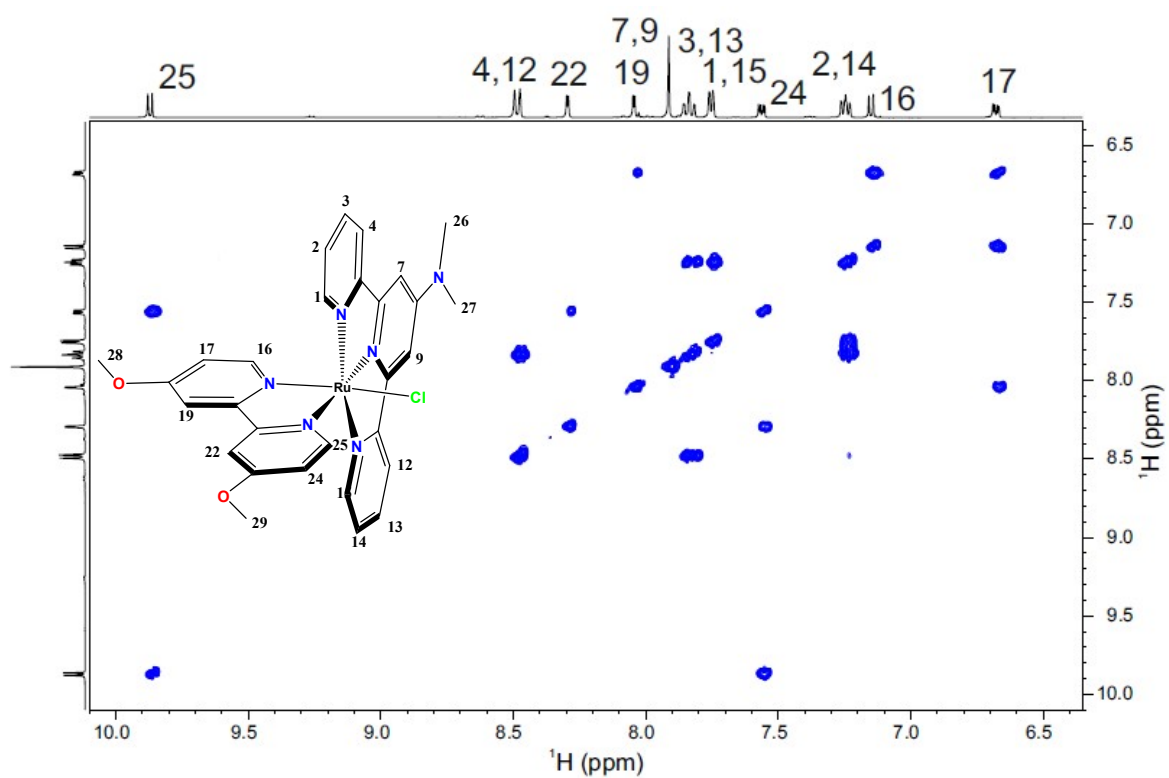

**Figure S3.** 2D  $^1\text{H}$ - $^1\text{H}$  COSY spectrum of **1** dissolved in  $\text{CD}_3\text{OD}$ .

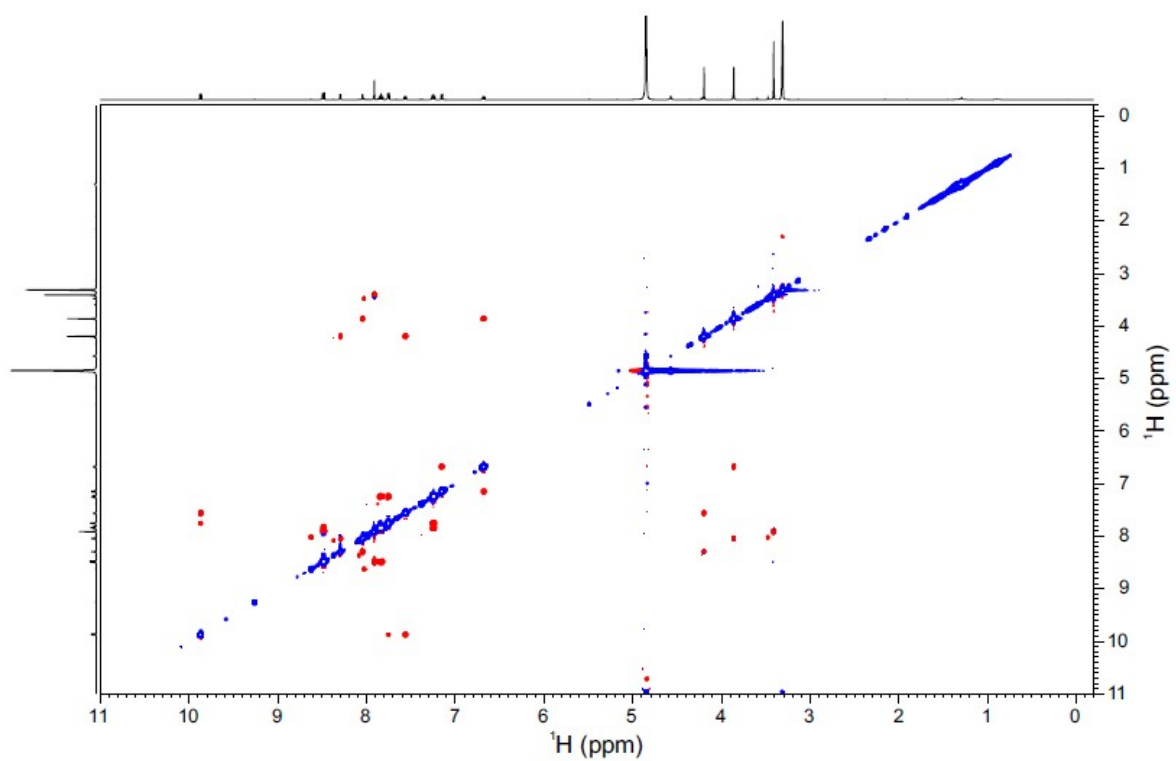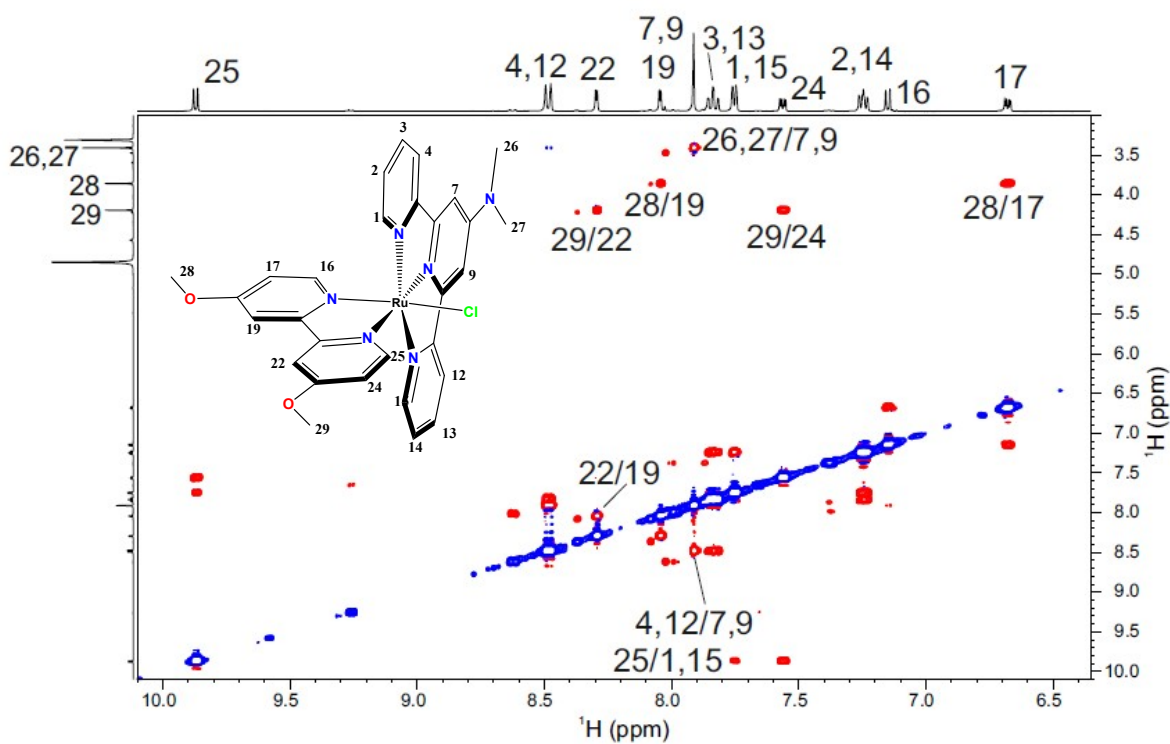

**Figure S4.** 2D  $^1\text{H}$ - $^1\text{H}$  NOESY spectrum of **1** dissolved in  $\text{CD}_3\text{OD}$ .

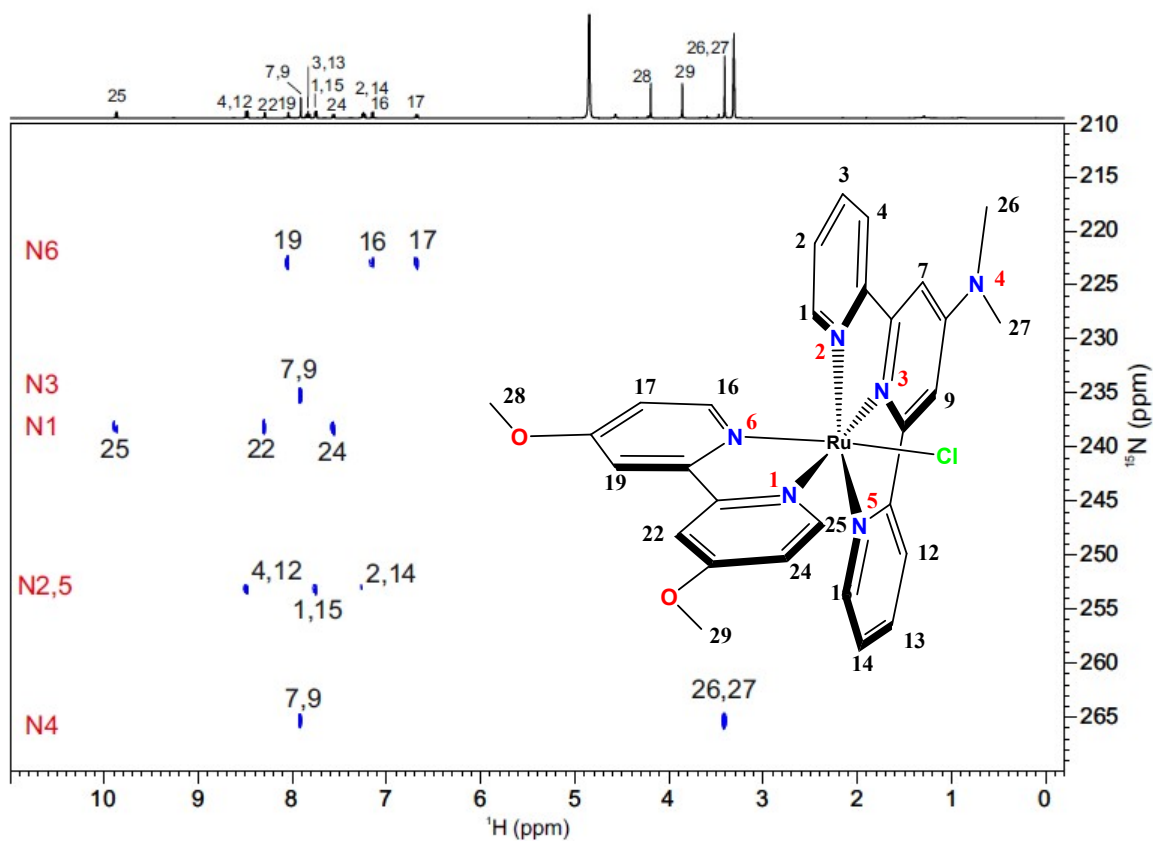

Figure S5.  $^1\text{H}$ - $^{15}\text{N}$  HMBC spectrum of **1** dissolved in  $\text{CD}_3\text{OD}$ .

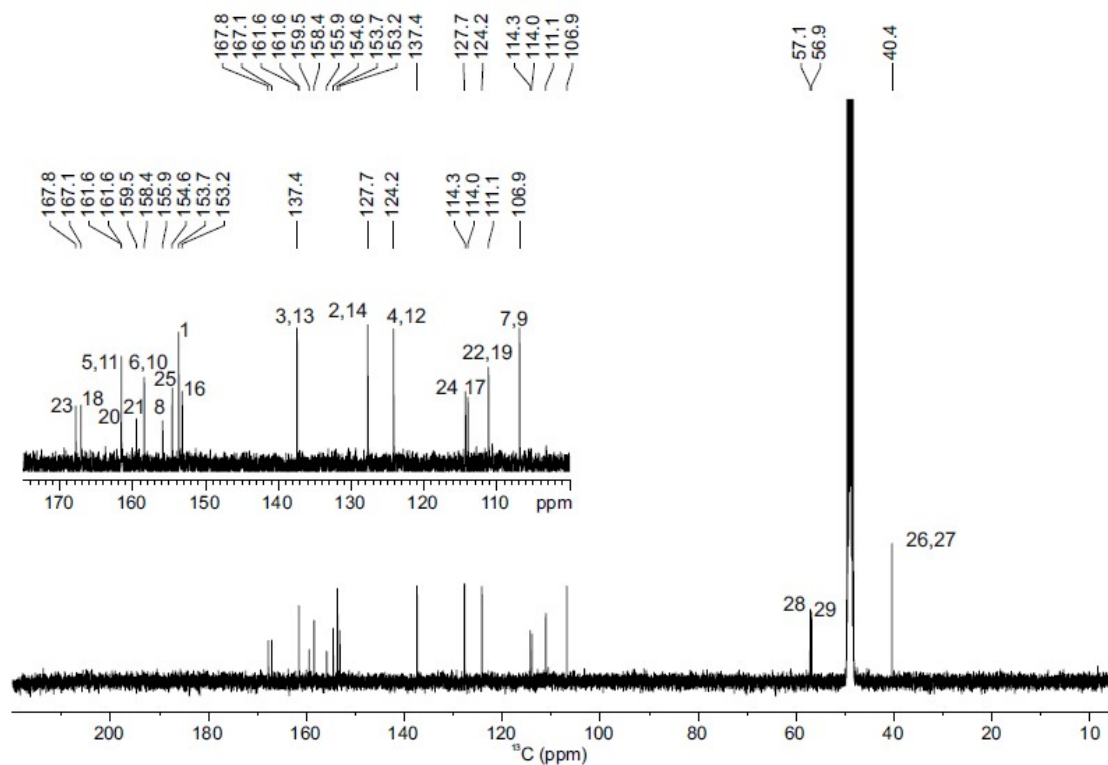

Figure S6. 100 MHz  $^{13}\text{C}$  NMR spectrum of **1** dissolved in  $\text{CD}_3\text{OD}$ .

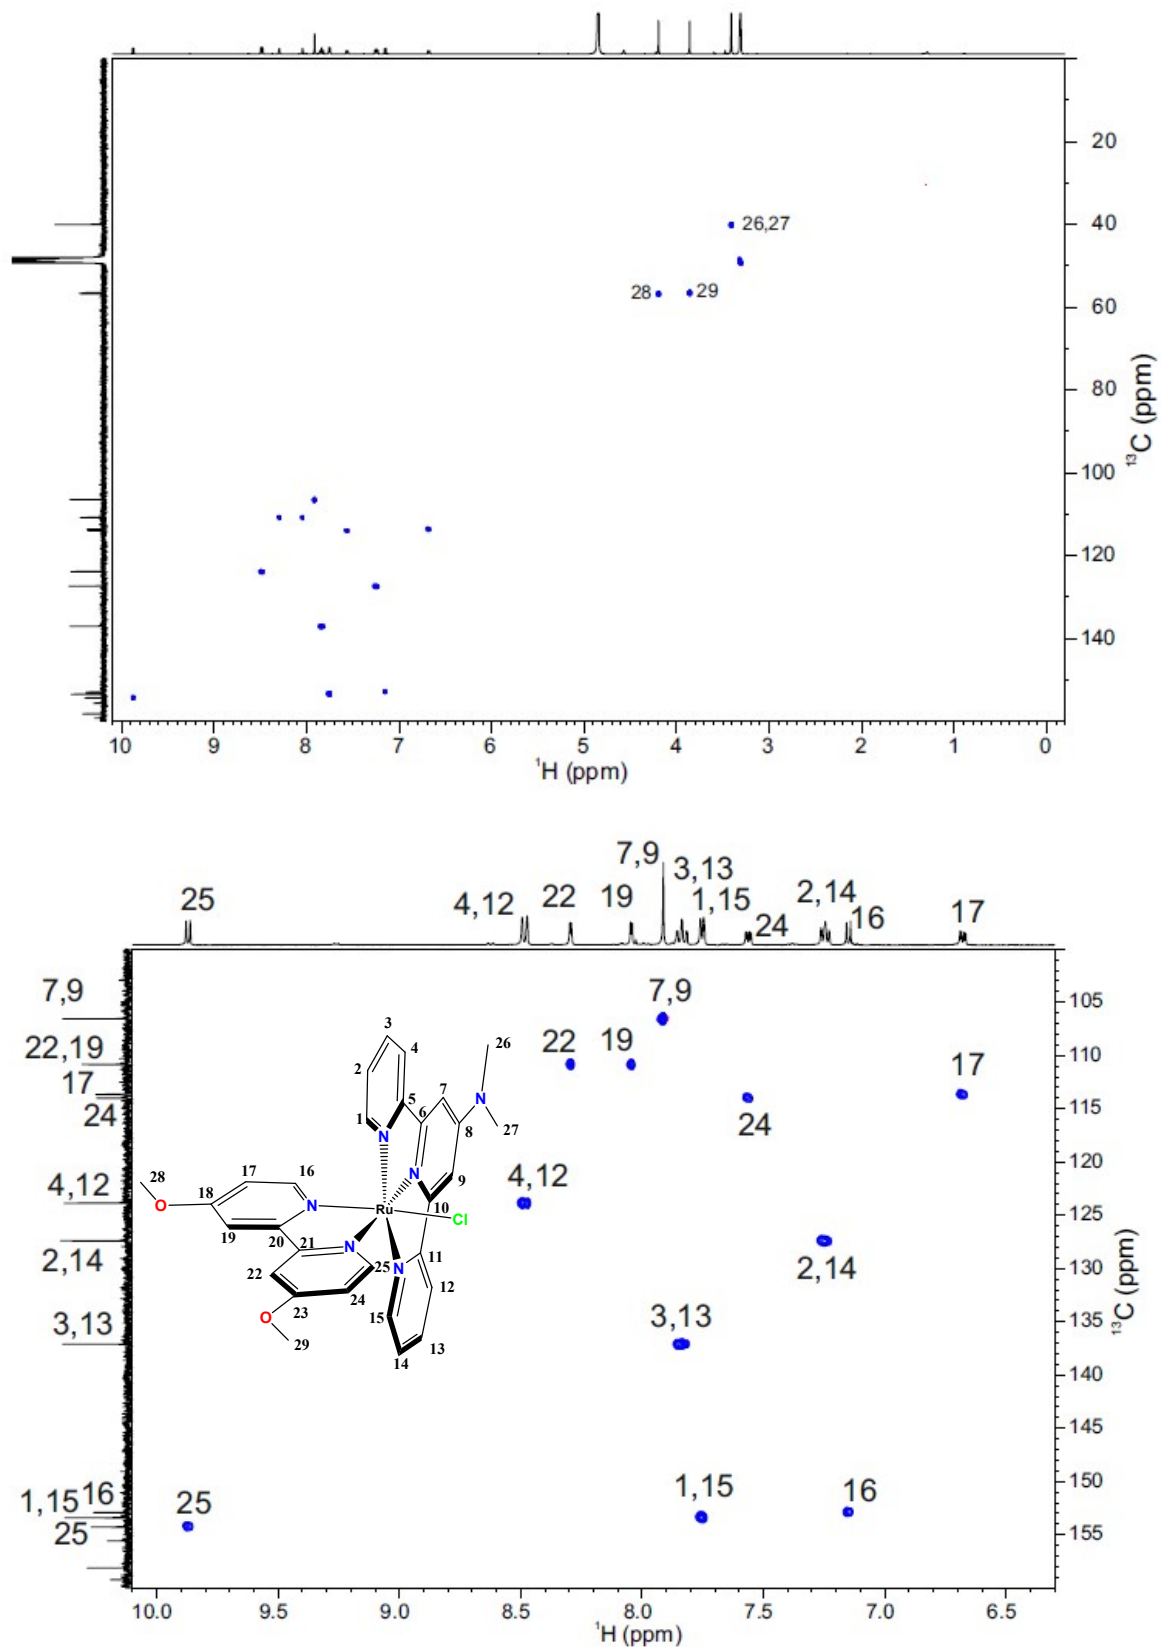

Figure S7. 2D  $^1\text{H}$ - $^{13}\text{C}$  HSQC spectrum of **1** dissolved in  $\text{CD}_3\text{OD}$ .



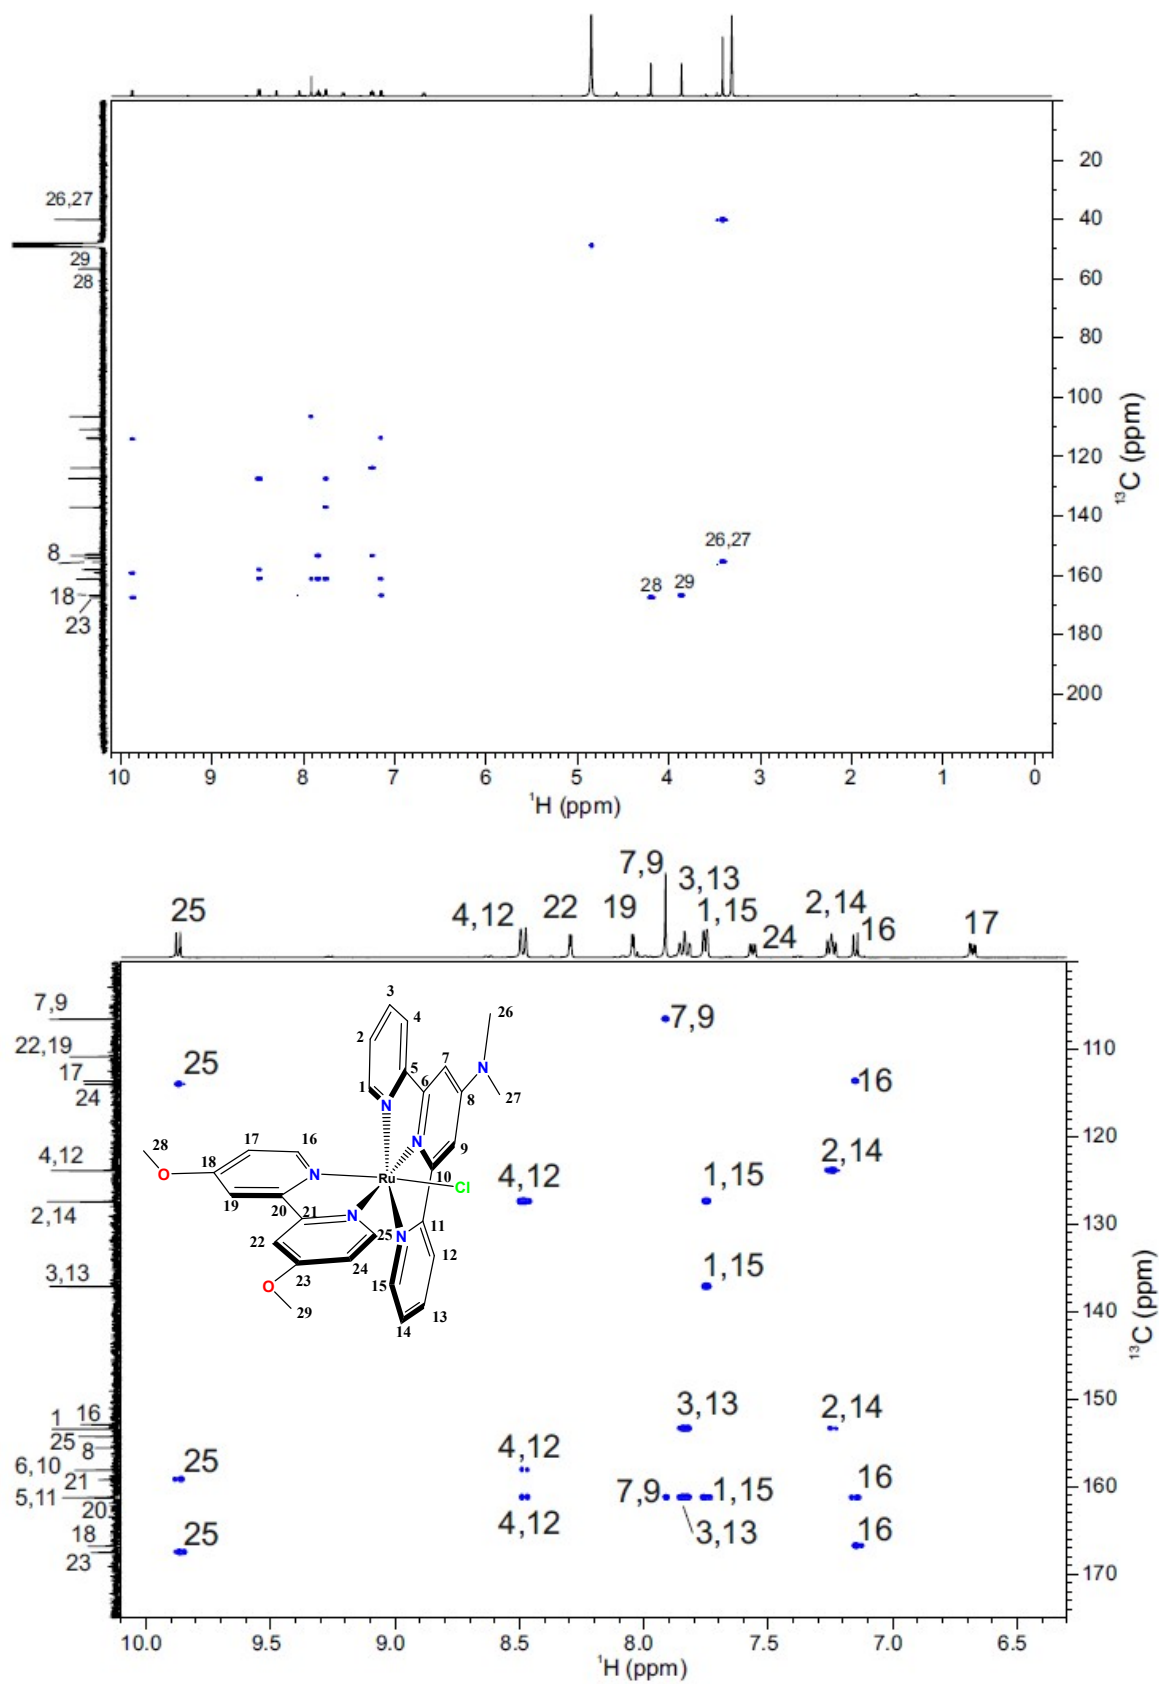

**Figure S8.** 2D <sup>1</sup>H-<sup>13</sup>C HMBC spectrum of **1** dissolved in CD<sub>3</sub>OD.

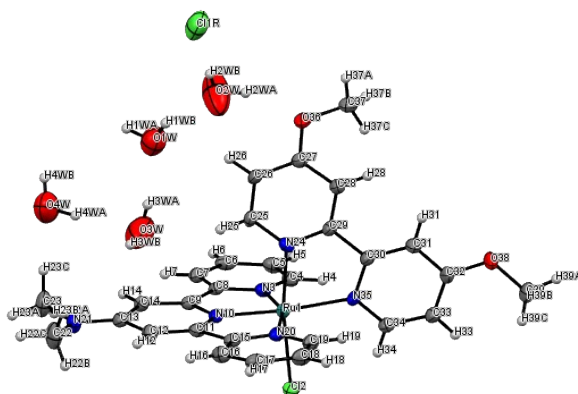

**Figure S9.** Crystal structure of **1·3H<sub>2</sub>O** with counter-anion and solvent molecules.

**Table S1.** Sample and crystal data for **1·3H<sub>2</sub>O**.

|                        |                                                                                  |              |
|------------------------|----------------------------------------------------------------------------------|--------------|
| Chemical formula       | C <sub>29</sub> H <sub>36</sub> Cl <sub>2</sub> N <sub>6</sub> O <sub>6</sub> Ru |              |
| Formula weight         | 736.61 g/mol                                                                     |              |
| Temperature            | 1001 K                                                                           |              |
| Wavelength             | 0.71076 Å                                                                        |              |
| Crystal size           | 0.060 x 0.120 x 0.500 mm                                                         |              |
| Crystal habit          | black needle                                                                     |              |
| Crystal system         | triclinic                                                                        |              |
| Space group            | P -1                                                                             |              |
| Unit cell dimensions   | a = 10.869(13) Å                                                                 | α = 107.961° |
|                        | b = 11.422(13) Å                                                                 | β = 110.491° |
|                        | c = 14.735(17) Å                                                                 | γ = 94.301°  |
| Volume                 | 1595.1 Å <sup>3</sup>                                                            |              |
| Z                      | 2                                                                                |              |
| Density (calculated)   | 1.533 g/cm <sup>3</sup>                                                          |              |
| Absorption coefficient | 0.710 mm <sup>-1</sup>                                                           |              |
| F(000)                 | 756                                                                              |              |

**Table S2. Data collection and structure refinement for 1·3H<sub>2</sub>O.**

|                                     |                                                                                             |
|-------------------------------------|---------------------------------------------------------------------------------------------|
| Diffractometer                      | D8 QUEST ECO three-circle diffractometer                                                    |
| Radiation source                    | Ceramic x-ray tube (Mo K $\alpha$ , $\lambda$ = 0.71076 Å)                                  |
| Theta range for data collection     | 2.89 to 29.11°                                                                              |
| Index ranges                        | -14 $\leq$ h $\leq$ 14, -15 $\leq$ k $\leq$ 15, -20 $\leq$ l $\leq$ 20                      |
| Reflections collected               | 110330                                                                                      |
| Independent reflections             | 8564 [R(int) = 0.0639]                                                                      |
| Coverage of independent reflections | 99.70%                                                                                      |
| Absorption correction               | Multi-Scan                                                                                  |
| Max. and min. transmission          | 0.7458 and 0.6599                                                                           |
| Structure solution technique        | direct methods                                                                              |
| Structure solution program          | SHELXT 2014/5 (Sheldrick, 2014)                                                             |
| Refinement method                   | Full-matrix least-squares on F <sup>2</sup>                                                 |
| Refinement program                  | SHELXL-2017/1 (Sheldrick, 2017)                                                             |
| Function minimized                  | $\Sigma w(F_o^2 - F_c^2)^2$                                                                 |
| Data / restraints / parameters      | 8564 / 0 / 401                                                                              |
| Goodness-of-fit on F <sup>2</sup>   | 1.057                                                                                       |
| Final R indices                     | 7188 data; $l > 2\sigma(l)$ R1 = 0.0445, wR2 = 0.1072<br>all data R1 = 0.0597, wR2 = 0.1200 |
| Weighting scheme                    | $w = 1 / [\sigma^2(F_o^2) + (0.0495P)^2 + 5.8501P]$<br>where $P = (F_o^2 + 2F_c^2) / 3$     |
| Largest diff. peak and hole         | 3.604 and -2.276 eÅ <sup>-3</sup>                                                           |
| R.M.S. deviation from mean          | 0.126 eÅ <sup>-3</sup>                                                                      |

**Table S3. Bond lengths (Å) for 1·3H<sub>2</sub>O.**

|          |          |          |          |          |          |          |          |
|----------|----------|----------|----------|----------|----------|----------|----------|
| Ru1-N10  | 1.9771   | Ru1-N24  | 2.0501   | C23-H23A | 0.98     | C23-H23B | 0.98     |
| Ru1-N3   | 2.0731   | Ru1-N20  | 2.0841   | C23-H23C | 0.98     | N24-C25  | 1.357(4) |
| Ru1-N35  | 2.0931   | Ru1-C12  | 2.4311   | N24-C29  | 1.371(4) | C25-C26  | 1.385(5) |
| N3-C4    | 1.346(4) | N3-C8    | 1.374(4) | C25-H25  | 0.95     | C26-C27  | 1.406(4) |
| C4-C5    | 1.394(4) | C4-H4    | 0.95     | C26-H26  | 0.95     | C27-O36  | 1.354(4) |
| C5-C6    | 1.396(5) | C5-H5    | 0.95     | C27-C28  | 1.396(4) | C28-C29  | 1.403(4) |
| C6-C7    | 1.393(5) | C6-H6    | 0.95     | C28-H28  | 0.95     | C29-C30  | 1.475(4) |
| C7-C8    | 1.399(4) | C7-H7    | 0.95     | C30-N35  | 1.369(4) | C30-C31  | 1.387(4) |
| C8-C9    | 1.488(4) | C9-N10   | 1.353(4) | C31-C32  | 1.402(4) | C31-H31  | 0.95     |
| C9-C14   | 1.392(4) | N10-C11  | 1.353(4) | C32-O38  | 1.351(4) | C32-C33  | 1.395(5) |
| C11-C12  | 1.386(4) | C11-C15  | 1.491(4) | C33-C34  | 1.390(4) | C33-H33  | 0.95     |
| C12-C13  | 1.421(4) | C12-H12  | 0.95     | C34-N35  | 1.347(4) | C34-H34  | 0.95     |
| C13-N21  | 1.364(4) | C13-C14  | 1.421(5) | O36-C37  | 1.460(4) | C37-H37A | 0.98     |
| C14-H14  | 0.95     | C15-N20  | 1.376(4) | C37-H37B | 0.98     | C37-H37C | 0.98     |
| C15-C16  | 1.393(4) | C16-C17  | 1.394(5) | O38-C39  | 1.433(4) | C39-H39A | 0.98     |
| C16-H16  | 0.95     | C17-C18  | 1.381(5) | C39-H39B | 0.98     | C39-H39C | 0.98     |
| C17-H17  | 0.95     | C18-C19  | 1.398(5) | O1W-H1WA | 0.877    | O1W-H1WB | 0.9101   |
| C18-H18  | 0.95     | C19-N20  | 1.357(4) | O2W-H2WA | 0.87     | O2W-H2WB | 0.87     |
| C19-H19  | 0.95     | N21-C22  | 1.460(5) | O3W-H3WA | 0.87     | O3W-H3WB | 0.87     |
| N21-C23  | 1.460(4) | C22-H22A | 0.98     | O4W-H4WA | 0.87     | O4W-H4WB | 0.87     |
| C22-H22B | 0.98     | C22-H22C | 0.98     |          |          |          |          |

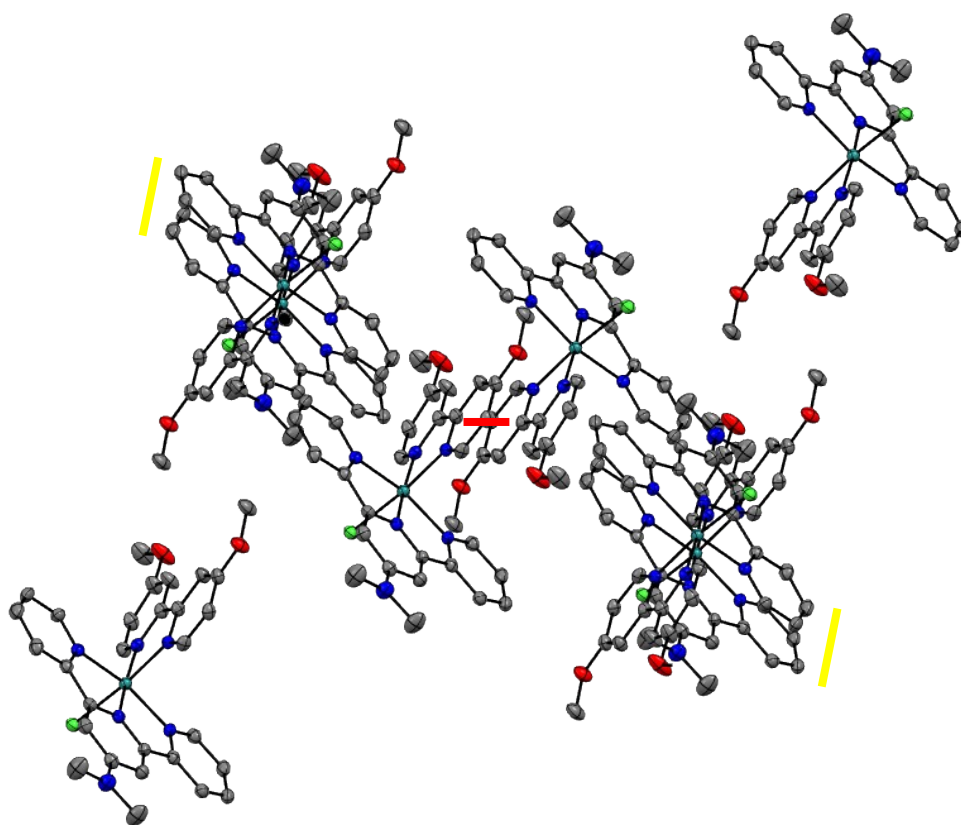

**Figure S10.** View of the two-dimensional layer formed by the cationic part of **1·3H<sub>2</sub>O**, showing intermolecular  $\pi_{\text{tpy}}-\pi_{\text{tpy}}$  (yellow line) and  $\pi_{\text{bpy}}-\pi_{\text{bpy}}$  (red line) stacking interactions.

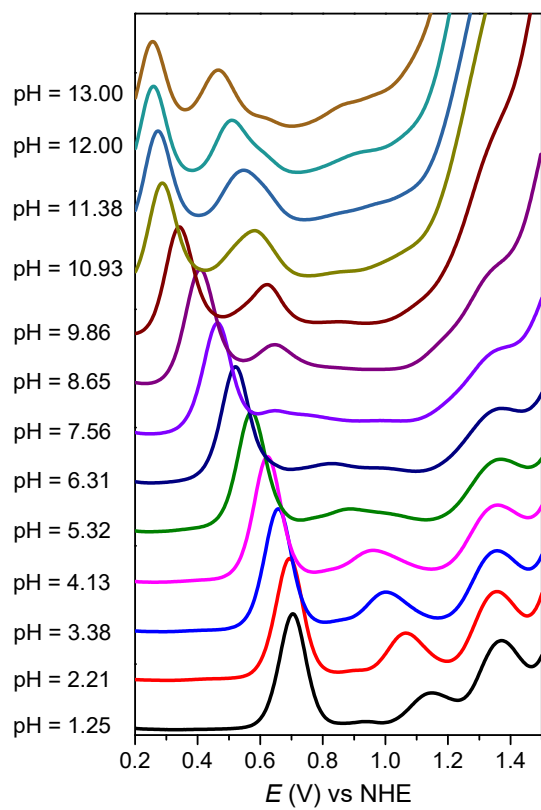

Figure S11. DPV of 2 vs pH.

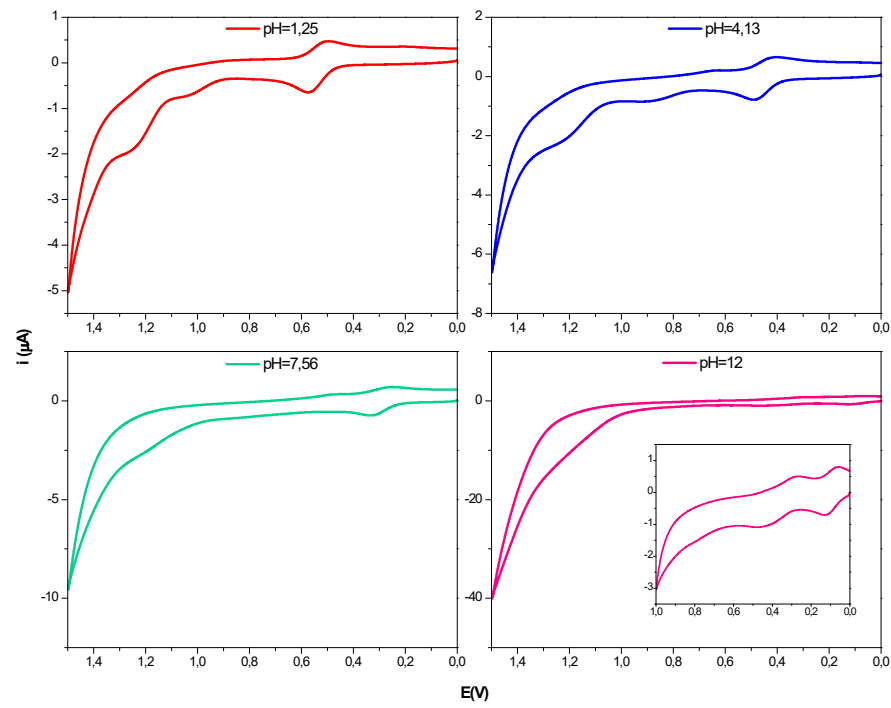

Figure S12. CV of 2 at different pH.

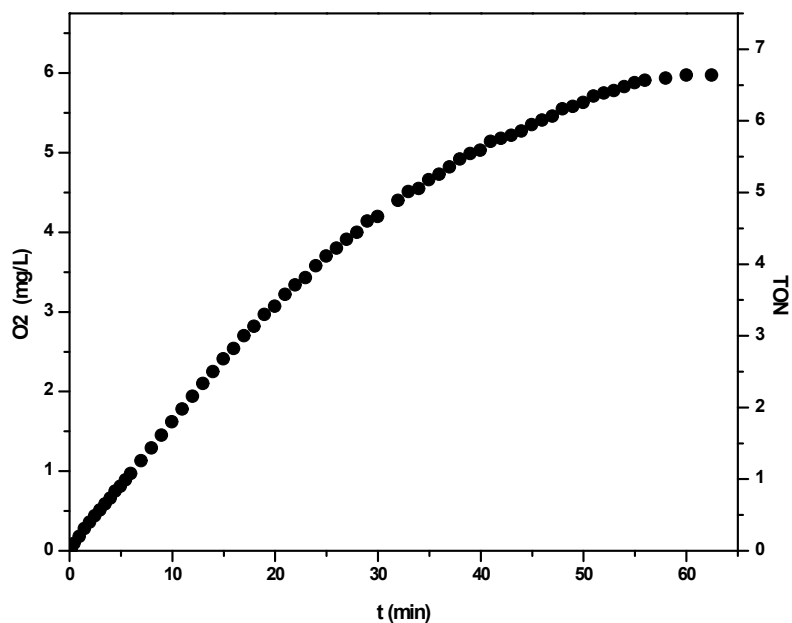

Figure S13. [O<sub>2</sub>] vs t for 2 in HClO<sub>4</sub> 0.1 M, C= 3.10<sup>-5</sup> M after adding 30 equivalents of Ce(IV). V<sub>f</sub>= 7.5 mL.

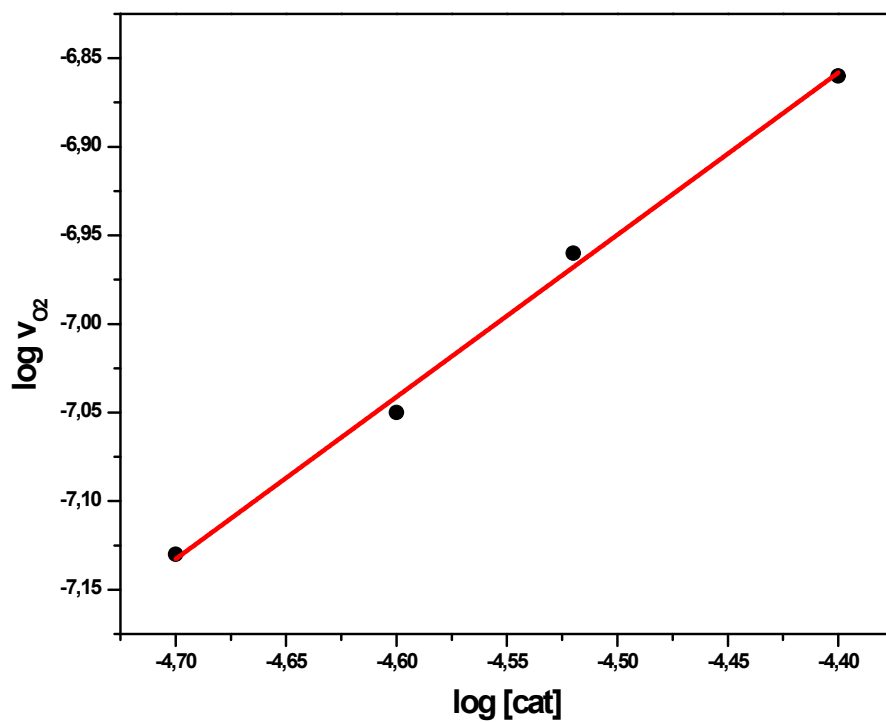

**Figure S14.**  $\log v_{O_2}$  vs.  $(\log [cat]_0)$  for **2** in  $HClO_4$  0.1 M at  $T=20^\circ C$ .  $[cat]_0=2 \times 10^{-5}$  M,  $2.5 \times 10^{-5}$  M,  $3 \times 10^{-5}$  M y  $4 \cdot 10^{-5}$  M.  $[Ce(IV)]_0=8.4 \times 10^{-3}$  M,  $1.05 \times 10^{-2}$  M,  $1.26 \times 10^{-2}$  M y  $1.68 \times 10^{-2}$  M.  $V_f=7,5$  ml.

**Table S4. Energies and percent contributions of selected MOs of complexes 1, 2 and 3 in their ground state.**

| Complex 1 | E (eV) | Ru | dmapy | py | dmobpy | Cl |
|-----------|--------|----|-------|----|--------|----|
| L+4       | -1.45  | 1  | 8     | 91 | 0      | 0  |
| L+3       | -1.61  | 2  | 0     | 37 | 61     | 0  |
| L+2       | -2.29  | 5  | 28    | 27 | 41     | 0  |
| L+1       | -2.36  | 5  | 27    | 67 | 0      | 1  |
| LUMO      | -2.39  | 1  | 21    | 23 | 55     | 0  |
| HOMO      | -5.41  | 59 | 30    | 2  | 2      | 7  |
| H-1       | -5.45  | 71 | 2     | 11 | 7      | 9  |
| H-2       | -5.63  | 74 | 1     | 7  | 17     | 1  |
| H-3       | -6.52  | 11 | 68    | 2  | 1      | 19 |
| H-4       | -7.09  | 2  | 24    | 29 | 1      | 44 |

| Complex 2 | E (eV) | Ru | dmapy | py | dmobpy | H <sub>2</sub> O |
|-----------|--------|----|-------|----|--------|------------------|
| L+4       | -1.53  | 1  | 9     | 91 | 0      | 0                |
| L+3       | -1.67  | 1  | 1     | 48 | 50     | 0                |
| L+2       | -2.35  | 4  | 17    | 17 | 62     | 0                |
| L+1       | -2.44  | 1  | 31    | 33 | 35     | 0                |
| LUMO      | -2.50  | 5  | 27    | 67 | 0      | 1                |
| HOMO      | -5.61  | 58 | 37    | 1  | 2      | 1                |
| H-1       | -5.77  | 77 | 1     | 8  | 13     | 0                |
| H-2       | -5.84  | 71 | 2     | 12 | 14     | 0                |
| H-3       | -6.73  | 25 | 69    | 4  | 1      | 2                |
| H-4       | -7.24  | 1  | 44    | 52 | 3      | 0                |

| Complex 3 | E (eV) | Ru | dmapy | py | dmobpy | CH <sub>3</sub> CN |
|-----------|--------|----|-------|----|--------|--------------------|
| L+4       | -1.52  | 1  | 8     | 91 | 0      | 0                  |
| L+3       | -1.67  | 1  | 0     | 41 | 58     | 0                  |
| L+2       | -2.38  | 4  | 22    | 21 | 53     | 1                  |
| L+1       | -2.45  | 1  | 27    | 29 | 44     | 0                  |
| LUMO      | -2.47  | 3  | 28    | 67 | 0      | 1                  |
| HOMO      | -5.75  | 50 | 44    | 1  | 2      | 3                  |
| H-1       | -5.87  | 77 | 2     | 9  | 11     | 2                  |
| H-2       | -5.93  | 69 | 2     | 10 | 16     | 3                  |
| H-3       | -6.8   | 30 | 62    | 4  | 1      | 3                  |
| H-4       | -7.25  | 1  | 44    | 52 | 3      | 0                  |



**Table S5. Selected singlet excited state transitions with their group contributions for complex 1 obtained from TD-DFT calculations in ethanol.**

| No.       | Wavelength (nm) | Osc. Strength | Major contributions                                                    |
|-----------|-----------------|---------------|------------------------------------------------------------------------|
| <b>6</b>  | 516.7           | 0.0632        | H-2->L+1 (37%)<br>HOMO->L+2 (45%)                                      |
| <b>7</b>  | 504.0           | 0.0856        | H-2->L+2 (40%)<br>H-1->LUMO (12%)<br>H-1->L+2 (15%)<br>HOMO->L+1 (26%) |
| <b>8</b>  | 491.4           | 0.1263        | H-2->LUMO (85%)                                                        |
| <b>18</b> | 367.5           | 0.0584        | H-2->L+5 (15%)<br>H-1->L+5 (61%)                                       |
| <b>27</b> | 324.9           | 0.1095        | H-2->L+5 (38%)<br>H-2->L+6 (10%)<br>H-1->L+5 (14%)<br>H-1->L+6 (15%)   |
| <b>32</b> | 292.4           | 0.3654        | H-5->L+1 (86%)                                                         |
| <b>47</b> | 266.6           | 0.6334        | HOMO->L+7 (24%)<br>HOMO->L+8 (37%)                                     |
| <b>99</b> | 216.5           | 0.3319        | H-8->L+5 (65%)                                                         |

| No.       | Ru            | dmapy        | py           | dmobpy        | Cl           |
|-----------|---------------|--------------|--------------|---------------|--------------|
| <b>6</b>  | 65-->5 (-60)  | 17-->27 (10) | 5-->45 (40)  | 8-->23 (15)   | 5-->0 (-5)   |
| <b>7</b>  | 69-->4 (-65)  | 9-->26 (17)  | 7-->37 (30)  | 11-->33 (22)  | 5-->0 (-5)   |
| <b>8</b>  | 73-->2 (-71)  | 2-->21 (19)  | 7-->25 (18)  | 16-->52 (36)  | 2-->0 (-2)   |
| <b>18</b> | 69-->8 (-61)  | 6-->4 (-2)   | 9-->51 (42)  | 9-->36 (27)   | 7-->0 (-7)   |
| <b>27</b> | 66-->6 (-60)  | 5-->5 (0)    | 9-->39 (30)  | 13-->50 (37)  | 7-->0 (-7)   |
| <b>32</b> | 6-->6 (0)     | 21-->26 (5)  | 29-->66 (37) | 9-->1 (-8)    | 35-->1 (-34) |
| <b>47</b> | 44-->23 (-21) | 26-->28 (1)  | 10-->24 (14) | 5-->23 (18)   | 15-->2 (-13) |
| <b>99</b> | 6-->10 (4)    | 11-->7 (-4)  | 6-->45 (39)  | 71-->38 (-33) | 6-->1 (-5)   |

**Table S6. Selected singlet excited state transitions with their group contributions for complex 2 obtained from TD-DFT calculations in ethanol.**

| <b>No.</b> | <b>Wavelength (nm)</b> | <b>Osc. Strength</b> | <b>Major contributions</b>                            |
|------------|------------------------|----------------------|-------------------------------------------------------|
| <b>2</b>   | 511.6                  | 0.0638               | HOMO->LUMO (78%)                                      |
|            | 490.6                  | 0.0747               | H-2->LUMO (31%)<br>HOMO->L+1 (18%)<br>HOMO->L+2 (47%) |
| <b>5</b>   |                        |                      |                                                       |
| <b>8</b>   | 459.2                  | 0.1771               | H-2->L+1 (81%)<br>H-1->L+2 (11%)                      |
| <b>18</b>  | 349.5                  | 0.0454               | H-1->L+5 (73%)                                        |
| <b>27</b>  | 310.3                  | 0.0006               | H-1->L+7 (22%)<br>H-1->L+10 (12%)<br>H-1->L+12 (55%)  |
| <b>32</b>  | 279.1                  | 0.0004               | H-5->LUMO (95%)                                       |
| <b>47</b>  | 257.8                  | 0.2246               | H-7->L+1 (19%)<br>H-7->L+2 (14%)<br>H-6->L+2 (49%)    |
| <b>99</b>  | 206.2                  | 0.0059               | H-11->L+1 (53%)<br>H-10->L+2 (35%)                    |

| <b>No.</b> | <b>Ru</b>    | <b>dmapy</b> | <b>py</b>     | <b>dmobpy</b> | <b>H<sub>2</sub>O</b> |
|------------|--------------|--------------|---------------|---------------|-----------------------|
| <b>2</b>   | 60-->5 (-55) | 31-->26 (-5) | 3-->60 (57)   | 4-->8 (4)     | 1-->1 (0)             |
| <b>5</b>   | 61-->5 (-56) | 26-->22 (-4) | 5-->36 (31)   | 6-->36 (30)   | 1-->0 (-1)            |
| <b>8</b>   | 71-->2 (-69) | 3-->29 (26)  | 11-->32 (21)  | 14-->38 (24)  | 0-->0 (0)             |
| <b>18</b>  | 74-->9 (-65) | 6-->2 (-4)   | 8-->42 (34)   | 12-->46 (34)  | 0-->1 1               |
| <b>27</b>  | 74-->67 (-7) | 4-->8 (4)    | 8-->7 (-1)    | 14-->12 (-2)  | 0-->6 (6)             |
| <b>32</b>  | 0-->5 (5)    | 0-->27 (27)  | 0-->67 (67)   | 99-->0 (-99)  | 0-->1 1               |
| <b>47</b>  | 6-->4 (-2)   | 1-->20 (19)  | 5-->21 (16)   | 89-->55 (-34) | 0-->0 (0)             |
| <b>99</b>  | 4-->2 (-2)   | 3-->25 (22)  | 47-->30 (-17) | 47-->43 (-4)  | 0-->0 (0)             |

**Table S7. Selected singlet excited state transitions with their group contributions for complex 3 obtained from TD-DFT calculations in ethanol.**

| No. | Wavelength (nm) | Osc. Strength | Major contributions                                   |
|-----|-----------------|---------------|-------------------------------------------------------|
| 2   | 477.2           | 0.0103        | H-2->LUMO (79%)<br>HOMO->L+2 (15%)                    |
| 6   | 463.8           | 0.0589        | H-2->LUMO (17%)<br>HOMO->L+1 (12%)<br>HOMO->L+2 (66%) |
| 8   | 445.6           | 0.1695        | H-2->L+1 (86%)                                        |
| 20  | 331.8           | 0.0678        | H-3->LUMO (49%)<br>H-2->L+5 (24%)<br>H-1->L+6 (19%)   |
| 27  | 308.1           | 0.1194        | H-2->L+5 (51%)<br>H-1->L+6 (21%)                      |
| 28  | 295.3           | 0.4253        | H-4->LUMO (91%)                                       |
| 49  | 254.1           | 0.6217        | HOMO->L+7 (79%)                                       |
| 68  | 228.7           | 0.3324        | H-6->L+3 (27%)<br>H-4->L+6 (18%)<br>H-2->L+10 (16%)   |
| 97  | 209.3           | 0.2122        | H-7->L+6 (81%)                                        |

| No. | Ru            | dmapy         | py           | dmobpy       | CH <sub>3</sub> CN |
|-----|---------------|---------------|--------------|--------------|--------------------|
| 2   | 65-->3 (-62)  | 10-->27 (17)  | 9-->59 (50)  | 13-->10 (-3) | 3-->1 (-2)         |
| 6   | 53-->3 (-50)  | 37-->23 (-14) | 3-->31 (28)  | 4-->41 (37)  | 3-->1 (-2)         |
| 8   | 69-->1 (-68)  | 3-->26 (23)   | 10-->29 (19) | 15-->43 (28) | 3-->0 (-3)         |
| 20  | 50-->4 (-46)  | 34-->16 (-18) | 7-->50 (43)  | 7-->29 (22)  | 3-->2 (-1)         |
| 27  | 65-->4 (-61)  | 9-->5 (-4)    | 10-->38 (28) | 13-->50 (37) | 3-->3 (0)          |
| 28  | 5-->4 (-1)    | 41-->27 (-14) | 50-->67 (17) | 4-->1 (-3)   | 0-->1 1            |
| 49  | 45-->4 (-41)  | 41-->53 (12)  | 4-->33 (29)  | 7-->7 (0)    | 3-->2 (-1)         |
| 68  | 30-->10 (-20) | 18-->3 (-15)  | 15-->18 1    | 35-->42 (7)  | 2-->27 (25)        |
| 97  | 9-->2 (-7)    | 4-->6 1       | 8-->6 (-2)   | 78-->86 (8)  | 1-->1 (0)          |

| Complex 1 | Complex 2 | Complex 3 |
|-----------|-----------|-----------|
|-----------|-----------|-----------|

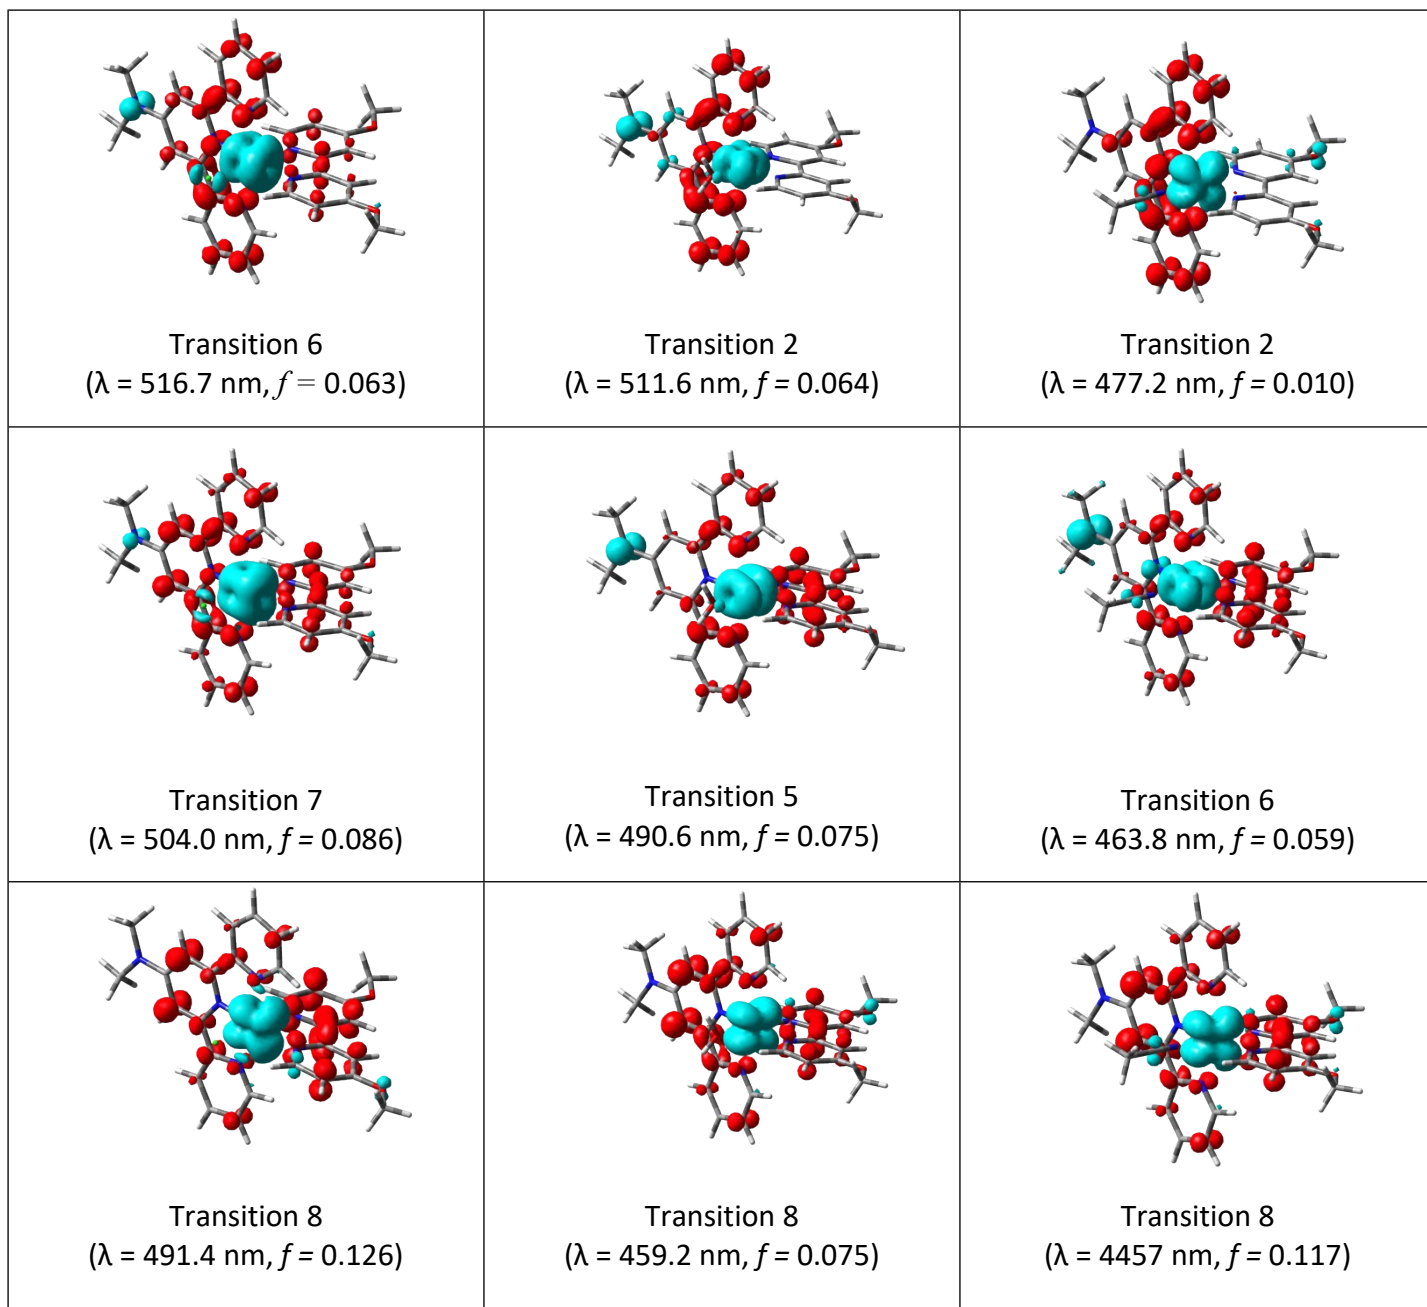

**Figure S15. EDDM obtained for the three transitions with major contributions to the lowest MLCTs in complexes 1-3.**
